# Supplementary material for: Homologous NiCoP@NiFeP heterojunction array achieving high-current hydrogen evolution for alkaline anion exchange membrane electrolyzers
Source: Royal Society of Chemistry journal article supplement (doi:10.1039/d2ta01233b), 2022-01-01
Supplement: d2ta01233b3.pdf [file d2ta01233b3.pdf]

## Supplementary information

# Homologous NiCoP@NiFeP Heterojunction Array Achieving High-Current Hydrogen Evolution for Alkaline Anion Exchange Membrane Electrolyzers

Yingxia Zhao,<sup>a</sup> Ming Sun,<sup>a</sup> Qunlei Wen,<sup>b</sup> Shuzhe Wang,<sup>b</sup> Shengbo Han,<sup>a</sup> Leheng Huang,<sup>a</sup> Gao cheng,<sup>a</sup> Youwen Liu<sup>b\*</sup> and Lin Yu<sup>a\*</sup>

Y.X. Zhao, Prof. M. Sun, S. B. Han, L. H. Huang, Gao cheng, Prof. L. Yu

<sup>a</sup> Key Laboratory of Clean Chemistry Technology of Guangdong Regular Higher Education Institutions, Guangdong Provincial Key Laboratory of Plant Resources Biorefinery, School of Chemical Engineering and Light Industry, Guangdong University of Technology, Guangzhou, 510006, P. R. China

E-mail: [gych@gdut.edu.cn](mailto:gych@gdut.edu.cn)

Q. L. Wen, S. Z. Wang, Prof. Y. W. Liu

<sup>b</sup> State Key Laboratory of Materials Processing and Die & Mould Technology, School of Materials Science and Engineering, Huazhong University of Science and Technology, Wuhan 430074, P. R. China

E-mail: [ywliu@hust.edu.cn](mailto:ywliu@hust.edu.cn)

## Materials

All the chemicals were used as received without further purification. Cobalt chloride hexahydrate ( $\text{CoCl}_2 \cdot 6\text{H}_2\text{O}$ , Chemical Reagent), nickel chloride hexahydrate ( $\text{NiCl}_2 \cdot 6\text{H}_2\text{O}$ , Chemical Reagent) Ferric nitrate nonahydrate ( $\text{Fe}(\text{NO}_3)_3 \cdot 9\text{H}_2\text{O}$ , Macklin), urea (Macklin), sodium hypophosphite hydrate ( $\text{NaH}_2\text{PO}_2 \cdot \text{H}_2\text{O}$ , Chemical Reagent), potassium hydroxide (KOH, Macklin),  $\text{RuO}_2$  (Aladdin), and platinum on carbon (20 wt% Pt/C, Aladdin).

## Characterizations

The phase composition of the samples was identified using a PANalytical X-ray Diffractometer (X'Pert3 Powder) equipped with Cu  $K\alpha$  radiation in the scanning range of  $10\text{-}80^\circ$  ( $2\theta$ ). The morphology of the materials was observed on a Hitachi Su8220 scanning the field emission scanning electron microscope (FESEM) and high-resolution transmission electron microscopy (HRTEM), select area electron diffraction (SAED) pattern, and energy-dispersive spectrometer elemental mapping (EDX-mapping) were acquired on Bruker Nano

GmbH Berlin. The chemical composition and status of samples were detected by using Thermo Fisher Escalab 250Xi X-ray photoelectron spectroscopy (XPS).

### Electrochemical measurements

The electrochemical measurements were conducted on an electrochemical workstation (ZAHNER ZENNIUM/IM6) using a standard tri-electrode system. Only 1 cm<sup>2</sup> of electrocatalyst is served as the working electrode, and graphite rod and Ag/AgCl electrode (3.5 M KCl solution) were served as counter electrode and reference electrode, respectively. The potentials measured were converted to the reversible hydrogen (RHE) by the Nernst equation:  $E_{VS.RHE} = E_{VS.Ag/AgCl} + 0.059\text{pH} + E_{Ag/AgCl}^{\theta}$ . All the resulting potentials without IR-corrected. Had been activated with e adequate cyclic voltammetry (CV) before all electrochemical tests. The linear sweep voltammetry (LSV) is obtained with a scanning rate of 1mV s<sup>-1</sup> reaching a steady-state to minimize experimental error. Electrochemical impedance spectroscopy (EIS) was processed from 100 kHz to 10 mHz with 5 mV ac amplitude. transform Polarization curve by a simplified formula ( $\eta = a + b \log j$ ), where b defines the Tafel slope. The electrochemical capacitance in the range of non-faraday (1.1307-1.1707 V vs. RHE for OER, 1.0087-1.0587 V vs. RHE for HER) was conducted by CV with a series of scanning rates (eg.: 100, 80, 60, 40, and 20 mV s<sup>-1</sup>) to calculate the double layer capacitance which can estimate the electrochemical surface area. For comparison, the CFP (1\*1 cm<sup>2</sup>) coated with commercial catalyst (20 wt% Pt/C and RuO<sub>2</sub>) in the same amount of mass loading as the NiCoP@NiFeP was considered as cathode and anode electrode, respectively. The stability was assessed by the Multi-Current Steps method.

An AEM (MTR-1 Tianjin GAOSSUNION PHOTOELECTRIC Technology Co., Ltd. China), which consists of a current collector, MEA type reactor (serpentine channel), Anion exchange membrane (Fuma FAA-PK-130), working electrodes (NiCoP@NiFeP). For comparison, the CFP (1\*1 cm<sup>2</sup>) coated with commercial catalyst (20 wt% Pt/C and RuO<sub>2</sub>) in the same amount of mass loading (1.1 mg cm<sup>-2</sup>) as the NiCoP@NiFeP was considered

as cathode and anode electrode, respectively. All the AEM resulting potentials with 90% IR-corrected ( $R_{\text{corr}}$  0.5  $\Omega$ ).

**S1 The SEM images of different ratio of NiCo:NiFe in NiCo@NiFe Pre and the corresponding phosphates**

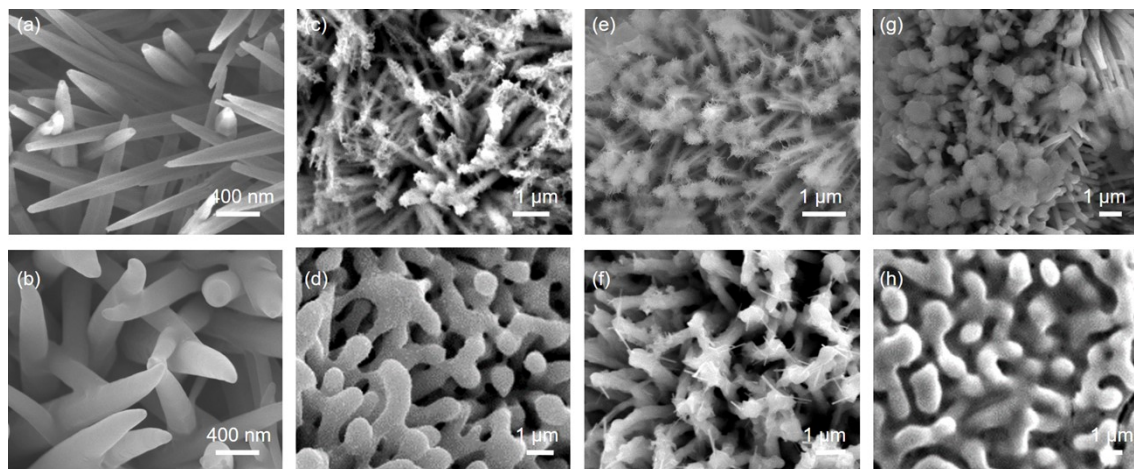

**Fig. S1** SEM images of (a-b) NiCo NRs and NiCoP; (c-d) the ratio of NiCo:NiFe in NiCo@NiFe Pre less than 1 and the corresponding phosphates ; (e) the ratio of NiCo:NiFe in NiCo@NiFe Pre is about 1 and the corresponding phosphates (f) the ratio of NiCo:NiFe in NiCo@NiFe Pre is larger than 1 and the corresponding phosphates.

## S2 XRD pattern of samples

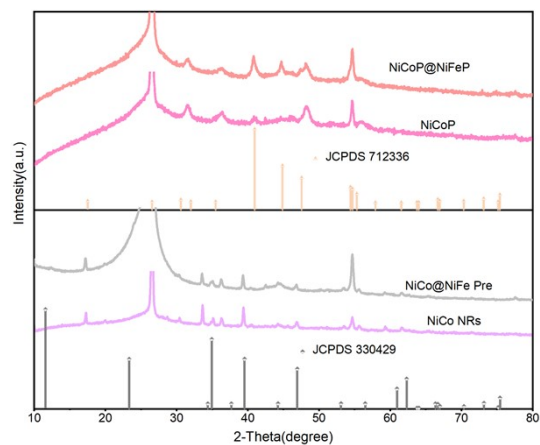

**Fig. S2.** XRD pattern of NiCo NRs, NiCo@NiFe precursors, NiCoP, and NiCoP@NiFeP.

### S3 XRD pattern of NiFe NRs and NiFeP

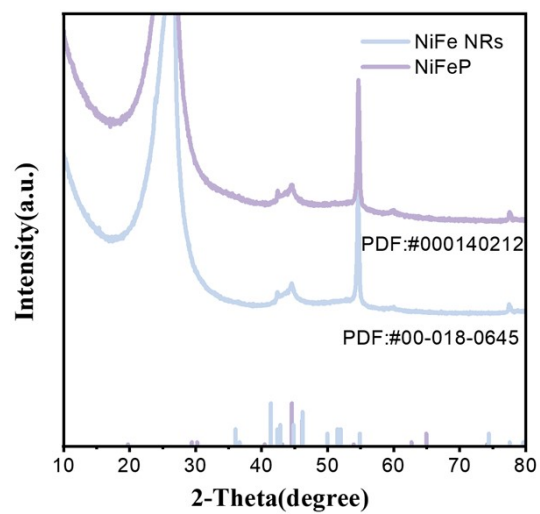

**Fig. S3.** XRD pattern of NiFe NRs and NiFeP.

#### S4 The SEM images of samples

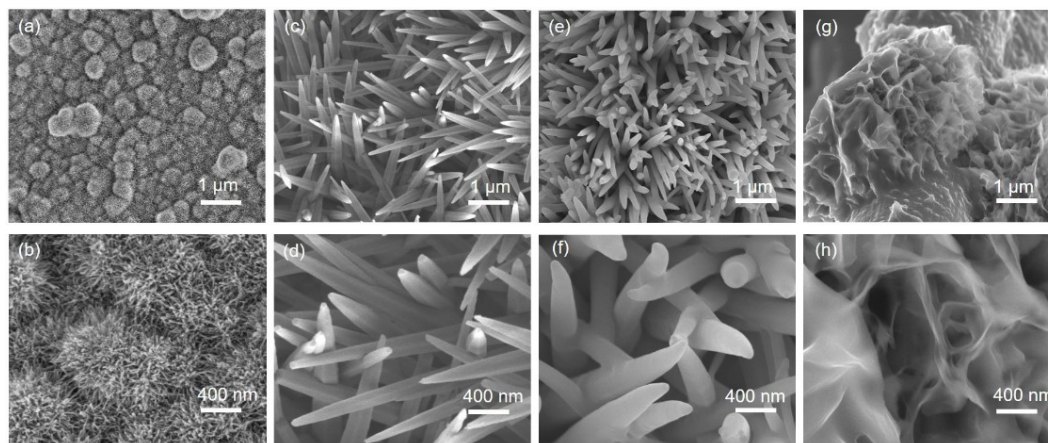

**Fig. S4.** SEM images of (a-b) NiFe NRs; (c-d) NiCo NRs; (e-f) NiCoP/CFP; and (g-h) NiFeP/CFP at different magnifications.

## S5 XPS pattern of NiFeP@ NiCoP and NiFeP

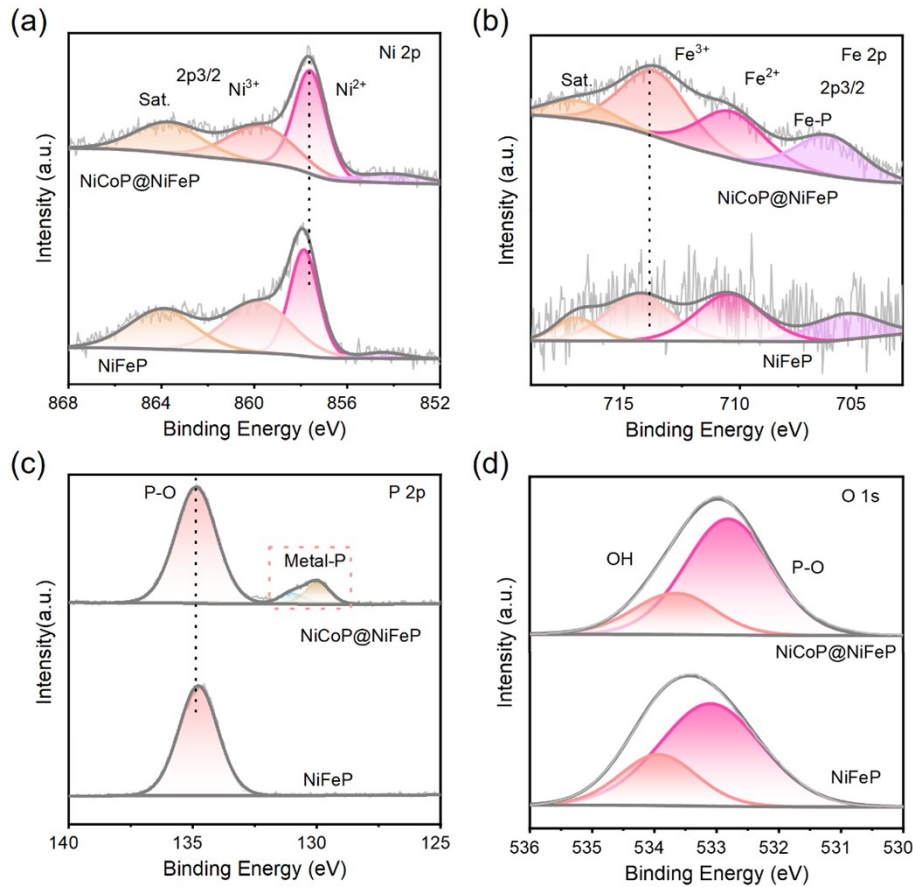

**Fig. S5.** XPS spectra of NiCoP@NiFeP /CFP and NiFeP/CFP. (a) Ni 2p; (c) Fe 2p ;(d) P 2p; (f) O 1s.

The XPS spectra of NiFeP were supplied in **Figure S5**. The Fe 2p<sub>3/2</sub> peaks of NiFeP at 705.6, 710.80 and 714.2 eV corresponds to the Fe-P bonding, Fe<sup>2+</sup>, and Fe<sup>3+</sup> characteristic peaks, respectively, whereas the other shakeup satellite peak distributed at around 717.2 eV. Comparing with the XPS spectra of NiFeP and NiCoP@NiFeP, we can clearly see that the Fe2p<sub>3/2</sub> of NiFeP obviously has a positive shift, while the peak position of the P 2p shows a negative shift, indicating an increased electronic density for P, suggesting the more pronounced electron transfer in NiCoP@NiFeP due to reaction between NiFeP and NiCoP in the closely contacted heterointerface (*Adv. Energy Mater.* 2019, 9, 1901213; *J. Mater. Chem. A*, 2021,9, 18421-18430). The XPS spectra in accordance with the DFT results that NiCoP@NiFeP moderate quantity of electrons, which owns ideal hydrogen adsorption energy. The following was replenished in the revised manuscript.



**S6 The polarization of different ratio of NiCo:NiFe in NiCo@NiFe Pre and the corresponding phosphates**

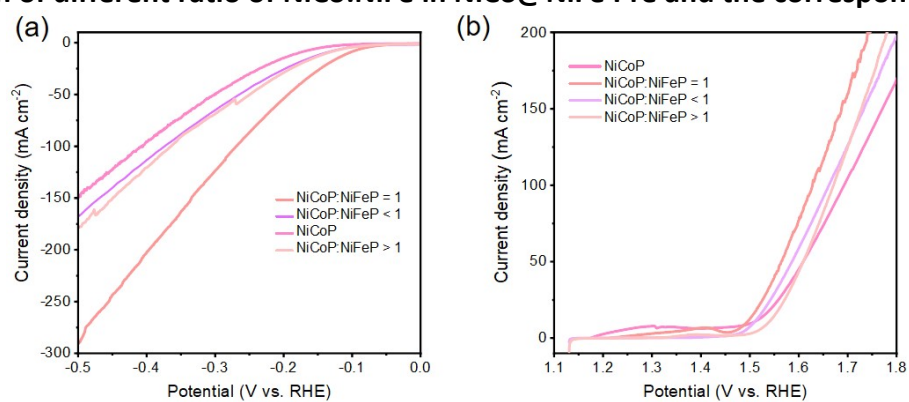

**Fig. S6** (a) The HER polarization curves of the different ratio of NiCoP and NiFeP samples in 1.0 M KOH solution

(b) The OER polarization curves of the different ratio of NiCoP and NiFeP samples in 1.0 M KOH solution.

S7 The equivalent circuit diagram of EIS

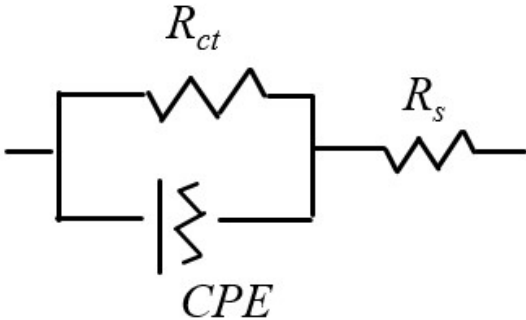

Fig. S7. the Randles circuit equivalent circuit diagram.

## S8 Cyclic voltammetry (CV) curves of HER

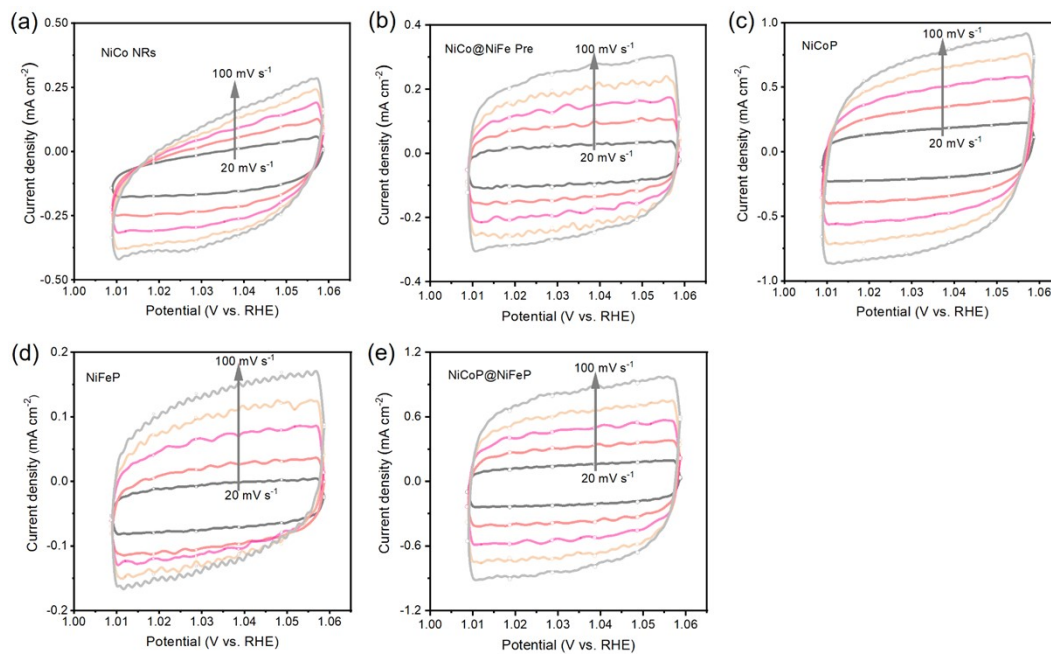

**Fig. S8.** Cyclic Volta photograms in the region of 1.0087-1.0587 V vs. RHE for (a) NiCo NRs /CFP; (b) NiCo@NiFe precursors /CFP; (c) NiCoP/CFP; (d) NiFeP/CFP; and (e) NiCoP@NiFeP/CFP at various scan rates (20, 40, 60 mV s<sup>-1</sup> etc.).

## S9 The crystal structures of samples

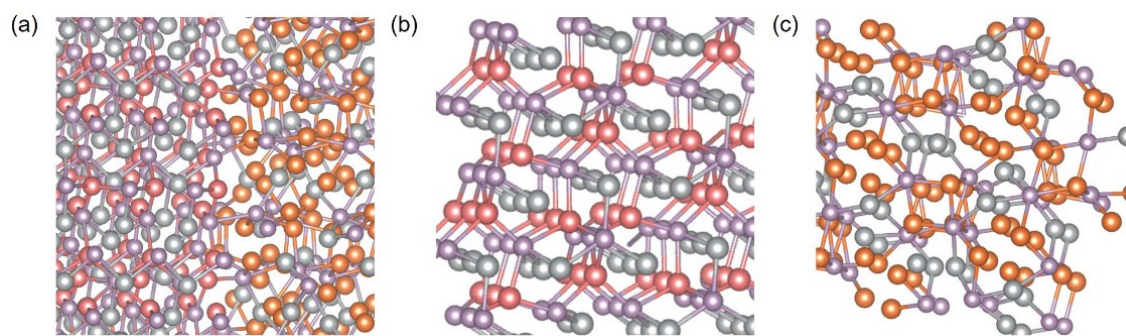

**Fig. S9.** (a)-(c) density of states of NiCoP@NiFeP, NiCoP, and NiFeP systems.

**S10.** Digital images of the wetting process of 1.0 M KOH droplets

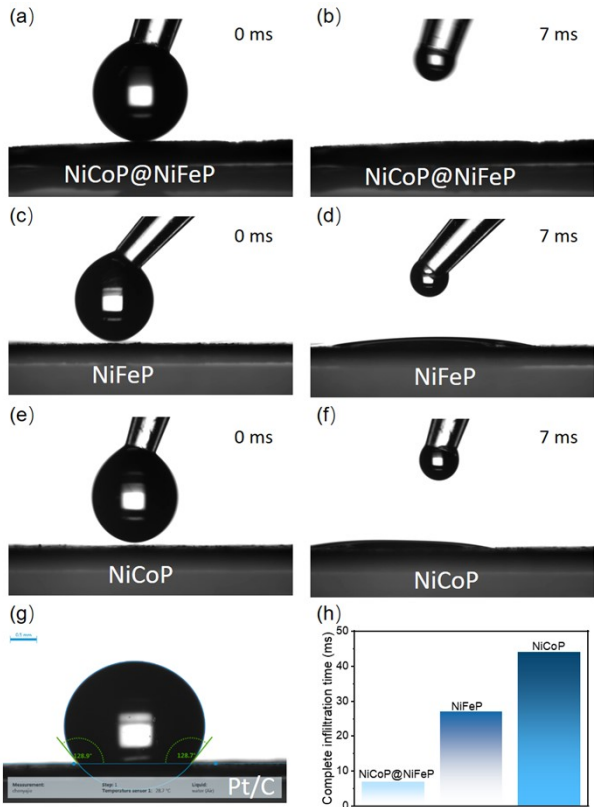

**Fig. S10.** Digital images of the wetting process of 1.0 M KOH droplets for (a-b) NiCoP@NiFeP; (c-d) NiFeP/CFP; (e-f) NiCoP/CFP; and (g) Pt/C., and (h) the complete infiltration time.

## S11. The Faradaic efficiency OER and HER

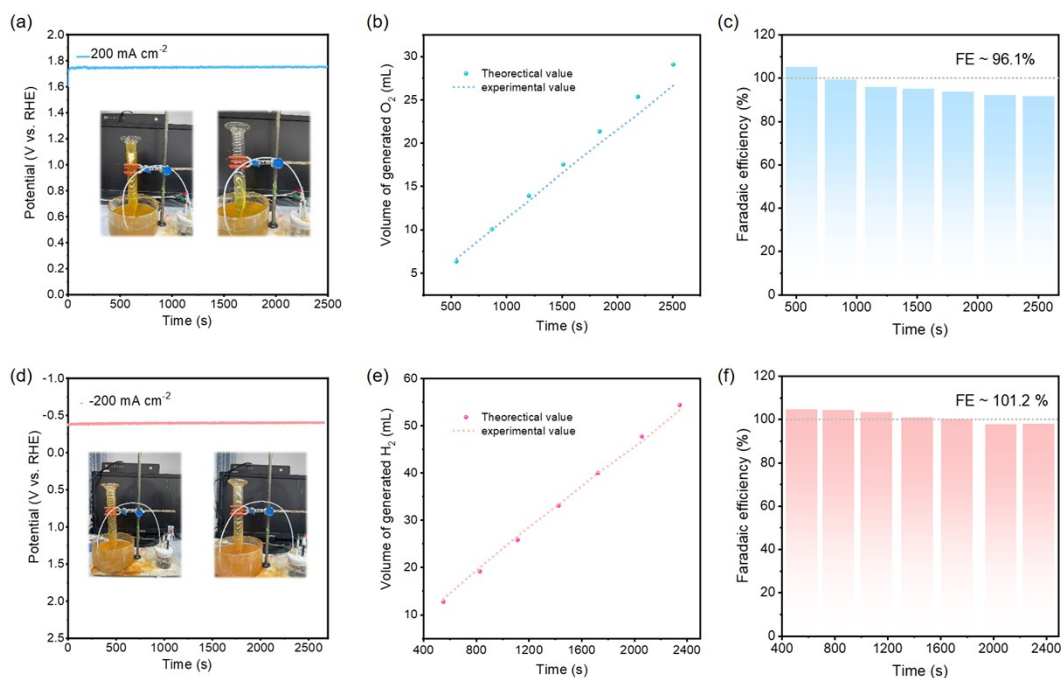

**Fig. S11.** (a) Time-dependent current density curves of NiCoP@NiFeP, with the inset showing the photograph of the measure setup via drainage gas gathering method. (b) Time-dependent O<sub>2</sub> yield and the theoretical value, and (c) the calculated Faradaic efficiency in OER; (d) Time-dependent current density curves of NiCoP@NiFeP (e) Time-dependent H<sub>2</sub> yield and the theoretical value, and (f) the calculated Faradaic efficiency in HER.

## S12 Cyclic voltammetry (CV) curves of OER

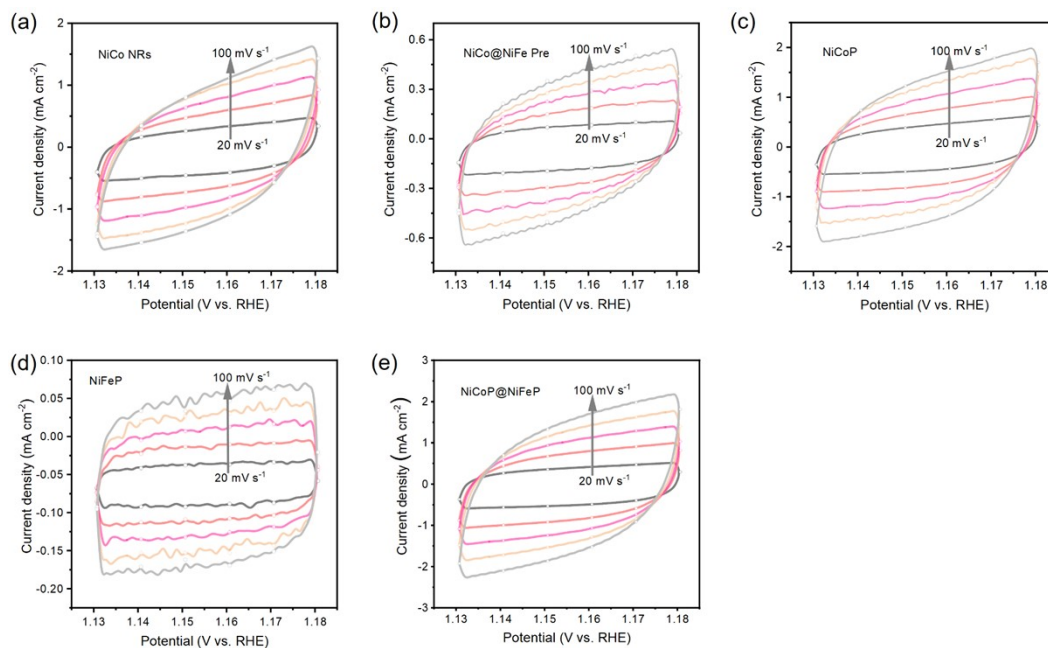

**Fig. S12.** Cyclic Volta photograms in the region of 1.1307-1.1807 V vs. RHE for (a)NiCo NRs /CFP, (b) NiCo@NiFe precursors /CFP, (c) NiCoP/CFP, (d) NiFeP/CFP, and (e) NiCoP@NiFeP/CFP at various scan rates (20, 40, 60 mV s<sup>-1</sup> etc.).

**S13 XRD patterns of NiCoP@NiFeP before and after HER/OER test**

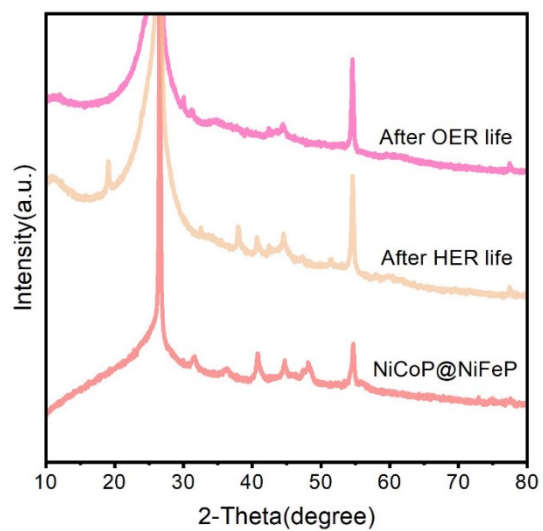

**Fig. S13.** XRD pattern of NiCoP@NiFeP after the Multi-Current Steps testing for overall water splitting.



S14 SEM images of NiCoP@NiFeP after HER/OER test

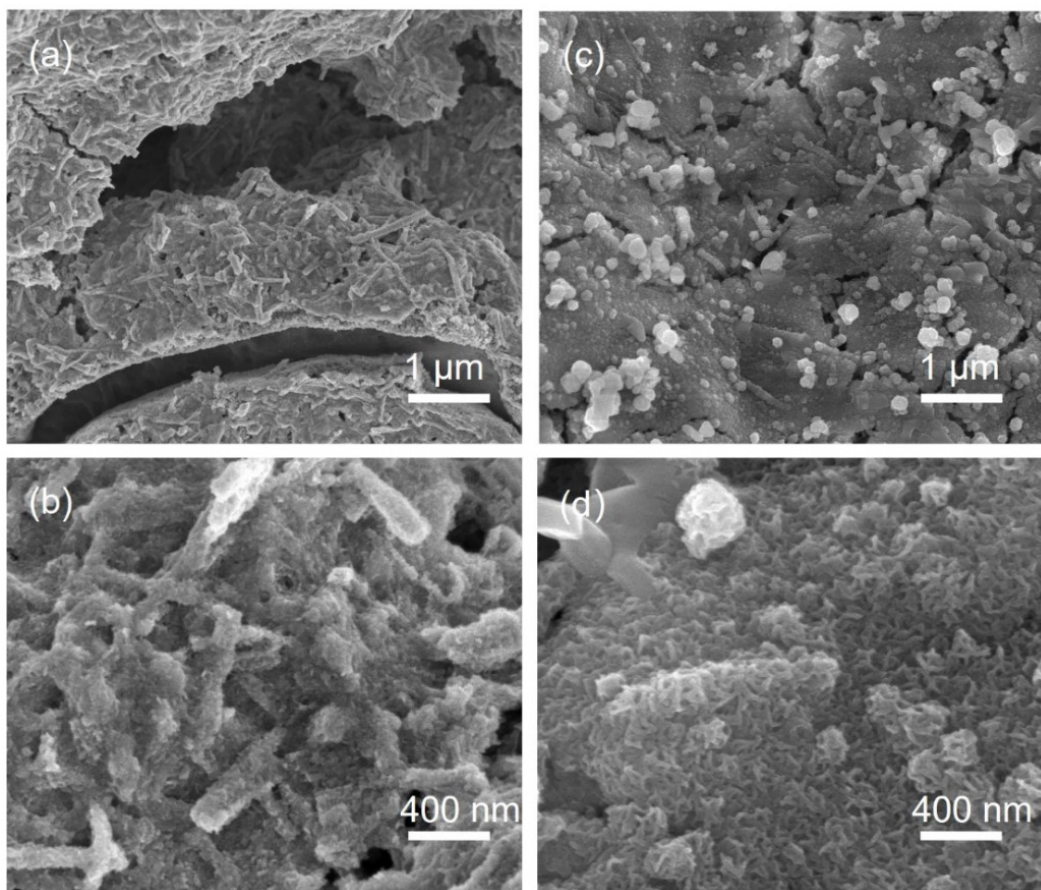

**Fig. S14.** SEM images of NiCoP@NiFeP(a-b) of the HER, (c-d) of the OER after the Multi-Current Steps testing for overall water splitting.

## S15 XPS spectras of NiCoP@NiFeP after HER/OER test

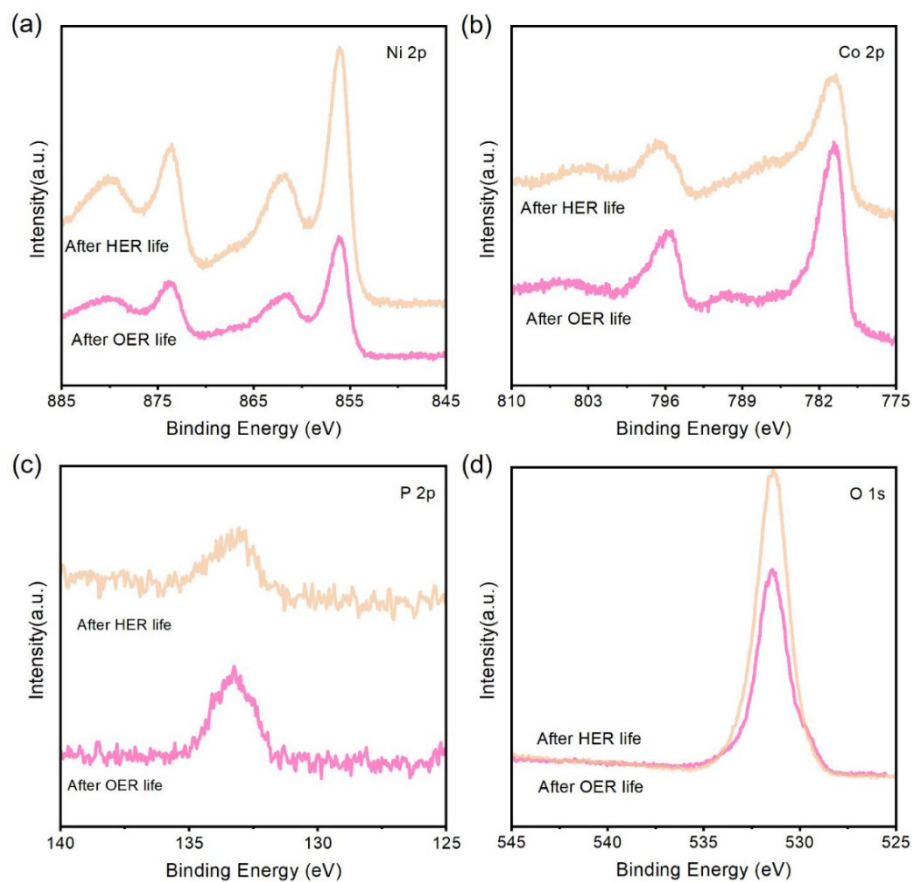

**Fig. S15.** XPS spectra (a) Ni 2p, (b) Co 2p, (c) P 2p, (d) O 1s of NiCoP@NiFeP after the step-chronopotentiometric testing for overall water splitting.

## S16 Cyclic voltammetry (CV) curves

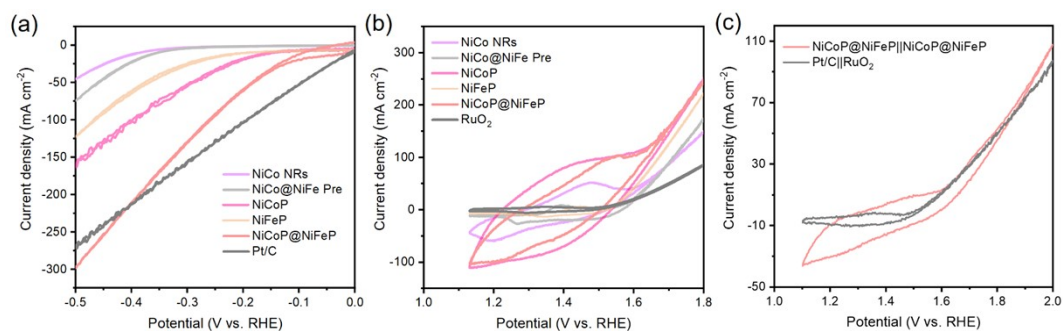

**Fig. S16.** Polarization curves (without iR compensation) (a) of the HER, (b) of the OER, (c) of the water electrolyzer with NiCoP@NiFeP || NiCoP@NiFeP and Pt/C || RuO<sub>2</sub> for overall water splitting.

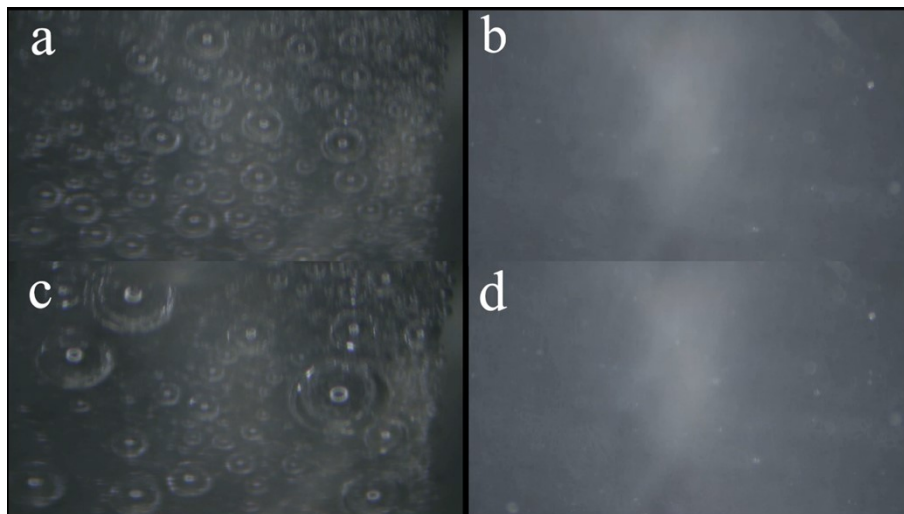

**Movie S1.** The movie of HER process of the (a)-(c) NiCoP@NiFeP, (b)-(d) Pt/Cat 50 and 200 mA cm<sup>-2</sup>

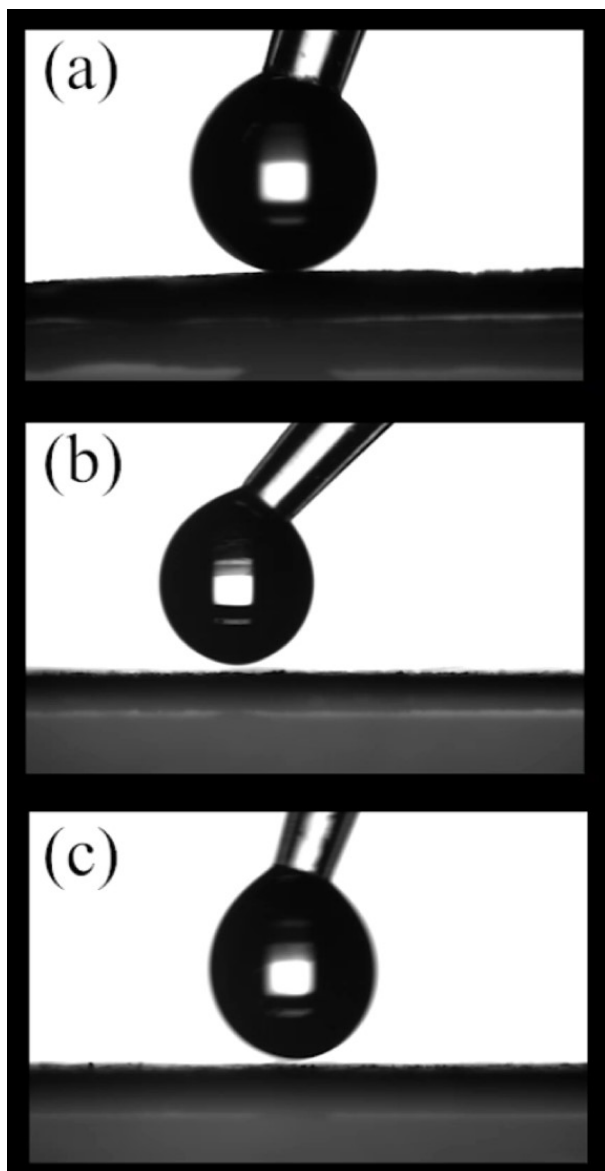

**Movie S2.** The movie of the wetting process of 1.0 M KOH droplets for (a-b) NiCoP@NiFeP; (c-d) NiFeP/CFP; (e-f) NiCoP/CFP

**Table S1.** Recent reported HER catalytic activity in alkaline electrolytes. ( $\eta_{10}$  is the abbreviative of  $\eta$  (mV) at 10 mA cm<sup>-2</sup>)

| Catalyst                                                              | $\eta_{10}$ | Ref.             | Catalyst                                                            | $\eta_{10}$ | Ref.         |
|-----------------------------------------------------------------------|-------------|------------------|---------------------------------------------------------------------|-------------|--------------|
| <b>NiCoP@NiFeP</b>                                                    | <b>98</b>   | <b>this work</b> | NiCoP/NPC                                                           | 128         | ref.S19 [19] |
| CoFe PBA@CoP                                                          | 100         | ref.S1 [1]       | NiCoP/CoP-Ti <sub>4</sub> O <sub>7</sub>                            | 128         | ref.S20 [20] |
| Mo-NiCo <sub>2</sub> O <sub>4</sub> /Co <sub>5,47</sub><br>N/NF       | 100         | ref.S2 [2]       | Ni <sub>2</sub> P-Fe <sub>2</sub> P                                 | 128         | ref.S21 [21] |
| CoS <sub>1-x</sub> P <sub>x</sub>                                     | 101         | ref.S3 [3]       | Fe-Ni <sub>3</sub> S <sub>2</sub> /Ni <sub>2</sub> P@C/NF           | 129         | ref.S22 [22] |
| S-NiCoP NW/CFP                                                        | 102         | ref.S4 [4]       | NiFeP/CC                                                            | 129         | ref.S23 [23] |
| NiCoP-NWAs/NF                                                         | 104         | ref.S5 [5]       | (Ni, Fe) <sub>2</sub> @MoS <sub>2</sub>                             | 130         | ref.S24 [24] |
| CoS <sub>x</sub> -Ni <sub>3</sub> S <sub>2</sub> /NF                  | 105         | ref.S6 [6]       | NiFe-LDH@CoS <sub>x</sub>                                           | 136         | ref.S25 [25] |
| FeOOH/Ni <sub>3</sub> S <sub>2</sub> /NF                              | 106         | ref.S7 [7]       | CoP@FeCoP                                                           | 141         | ref.S26 [26] |
| Mo-Ni <sub>3</sub> S <sub>2</sub> /Ni <sub>x</sub> P <sub>y</sub> /NF | 109         | ref.S8 [8]       | Co/CoO@NC@CC                                                        | 152         | ref.S27 [27] |
| NiCo <sub>1.6</sub> P alloy<br>coating                                | 112         | ref.S9 [9]       | 3D NiFe LDH-POM                                                     | 156         | ref.S28 [28] |
| FeNi <sub>2</sub> P@PC/CuxS                                           | 112         | ref.S10[10]      | Cu-(a-NiSe <sub>x</sub> /c-<br>NiSe <sub>2</sub> )/TiO <sub>2</sub> | 156.9       | ref.S29 [29] |
| Fe-Ni phosphide                                                       | 116         | ref.S11[11]      | CoP-InNC@CNT                                                        | 159         | ref.S30 [30] |
| Co-Ni-P/MoS <sub>2</sub>                                              | 116         | ref.S12[12]      | Co@Co-<br>P@NPCNTs                                                  | 160         | ref.S31 [31] |
| NiFeLDH@NiCoP/N<br>F                                                  | 120         | ref.S13[13]      | porous Ni <sub>2</sub> P<br>nanosheets                              | 168         | ref.S32 [32] |

CoP/NiCoP 121 ref.S14[14] PrGO/NiCoP 169 ref.S33 [33]

**Table S1 Continued.**

| <b>Catalyst</b>                          | <b><math>\eta_{10}</math></b> | <b>Ref.</b> | <b>Catalyst</b>                     | <b><math>\eta_{10}</math></b> | <b>Ref.</b>  |
|------------------------------------------|-------------------------------|-------------|-------------------------------------|-------------------------------|--------------|
| $(\text{Ni}_x\text{Fe}_{1-x})_2\text{P}$ | 125                           | ref.S15[15] | Co-Fe oxyphosphide<br>microtubes    | 180                           | ref.S34[34]  |
| FeNiP/NPCS                               | 126                           | ref.S16[16] | $\text{Cu}_3\text{N@CoNiCHs@CF}$    | 182                           | ref.S35[35]  |
| NiCoP-150                                | 127                           | ref.S17[17] | Fe- $\text{Ni}_5\text{P}_4$ /NiFeOH | 197                           | ref.S36 [36] |
| MXene-NiCoP                              | 127                           | ref.S18[18] | /                                   | /                             | /            |

**Table S2** Rct value in HER and OER process

| Samples          | $R_{ct}$ value<br>in HER process | $R_{ct}$ value<br>in OER process |
|------------------|----------------------------------|----------------------------------|
| NiCoP@NiFeP      | 2.61 $\Omega$                    | 1.79 $\Omega$                    |
| NiCoP            | 3.02 $\Omega$                    | 5.11 $\Omega$                    |
| NiFeP            | 12.0 $\Omega$                    | 2.94 $\Omega$                    |
| NiCo NRs         | 3.33 $\Omega$                    | 2.96 $\Omega$                    |
| NiCo@NiFe Pre    | 5.95 $\Omega$                    | 2.19 $\Omega$                    |
| Pt/C             | 1.01 $\Omega$                    | --                               |
| RuO <sub>2</sub> | --                               | 4.11 $\Omega$                    |



**Table S3.** Recent reported OER catalytic activity in alkaline electrolytes.

| Catalysts                                            | OER performance in alkaline condition   |                                         |                                          | Reference        |
|------------------------------------------------------|-----------------------------------------|-----------------------------------------|------------------------------------------|------------------|
|                                                      | $\eta$ (mV) at 10 mA cm <sup>-2</sup> ; | $\eta$ (mV) at 50 mA cm <sup>-2</sup> ; | $\eta$ (mV) at 100 mA cm <sup>-2</sup> ; |                  |
| <b>NiCoP@NiFeP</b>                                   | <b>256</b>                              | <b>300</b>                              | <b>330</b>                               | <b>this work</b> |
| Co <sub>x</sub> Fe <sub>1-x</sub> P                  | 277                                     | 305                                     | /                                        | ref.S37 [37]     |
| NiCoP                                                | 242                                     | 305                                     | 330                                      | ref.S38 [38]     |
| NiCoP/C@FeOOH                                        | 271                                     | 321                                     | 340                                      | ref.S39 [39]     |
| Ni/NiCoP                                             | 260                                     | 300                                     | 345                                      | ref.S40 [40]     |
| Mo-NiCoP                                             | 269                                     | 328                                     | 364                                      | ref.S41[41]      |
| NiFeVP                                               | 234                                     | 320                                     | 352                                      | ref.S42 [42]     |
| 3DP GC/NiFeP                                         | 180                                     | 255                                     | 340                                      | ref.S43 [43]     |
| NiFeP-WO <sub>x</sub>                                | 270                                     | 330                                     | 352                                      | ref.S44 [44]     |
| NiCoP                                                | /                                       | 308                                     | 332                                      | ref.S45 [45]     |
| Co <sub>12</sub> @Ni <sub>3</sub> S <sub>2</sub> /NF | /                                       | 358                                     | 420                                      | ref.S46 [46]     |
| Fe-NiCoP/PBA HNCs                                    | 290                                     | /                                       | /                                        | ref.S47 [47]     |
| N-NiCoP <sub>x</sub> /NCF                            | 298                                     | /                                       | /                                        | ref.S48 [48]     |
| Ni <sub>2-x</sub> Ru <sub>x</sub> P                  | 340                                     | /                                       | /                                        | ref.S49 [49]     |
| CoP/TiO <sub>x</sub>                                 | 330                                     | 380                                     | 420                                      | ref.S50 [50]     |
| CoFe/SNC                                             | 308                                     | /                                       | /                                        | ref.S51 [51]     |
| NiCo <sub>2</sub> O <sub>4</sub> /NCNTs/NiCo         | 350                                     | /                                       | /                                        | ref.S52 [52]     |
| NiFe(O <sub>xy</sub> )Hydroxides                     | 270                                     | /                                       | /                                        | ref.S53 [53]     |
| NiFeP/MXene                                          | 286                                     | /                                       | /                                        | ref.S54 [54]     |

**Table S4.** Recent reported overall water splitting catalytic activity in alkaline electrolytes.

| Catalysts                                                                   | Water splitting performance in alkaline condition |                  | Reference        |
|-----------------------------------------------------------------------------|---------------------------------------------------|------------------|------------------|
|                                                                             | Current density (mA cm <sup>-2</sup> )            | Cell voltage (V) |                  |
| <b>NiCoP@NiFeP</b>                                                          | <b>1000</b>                                       | <b>1.93</b>      | <b>this work</b> |
| Pt/C    RuO <sub>2</sub>                                                    | 1000                                              | 2.42             | <b>this work</b> |
| Ni <sub>3</sub> N/Ni    Ti-mesh                                             | 500                                               | 1.9              | ref.S55 [55]     |
| NiCoP(+)    NiCoP(-)                                                        | 1000                                              | 2.37             | ref.S56 [56]     |
| Ta-TaS <sub>2</sub>    IrO <sub>2</sub>                                     | 1000                                              | 1.98             | ref.S57 [57]     |
| NCCu                                                                        | 500                                               | 2.02             | ref.S58 [58]     |
| Pt/C/(NiCo) <sub>3</sub> Se <sub>4</sub>                                    | 1000                                              | 2                | ref.S59[59]      |
| NiS <sub>0.5</sub> Se <sub>0.5</sub>                                        | 350                                               | 1.98             | ref.S60 [60]     |
| Co <sub>4</sub> N-CeO <sub>2</sub>                                          | 1000                                              | 2.28             | ref.S61 [61]     |
| Ru-CoOx/NF                                                                  | 1000                                              | 2.2              | ref.S62 [62]     |
| Fe-FVO-60-act                                                               | 1000                                              | 2                | ref.S63 [63]     |
| 3D PNi                                                                      | 600                                               | 2.56             | ref.S64 [64]     |
| S-(Ni,Fe)OOH                                                                | 1000                                              | 1.951            | ref.S65 [65]     |
| NiFe(OH) <sub>x</sub> /FeS/IF   <br>MoNi <sub>4</sub> /MoO <sub>2</sub> /NF | 300                                               | 1.95             | ref.S66 [66]     |

- 1 L. Quan, S. H. Li, Z. P. Zhao, J. Q. Liu, Y. Ran, J. Y. Cui, W. Lin, X. L. Yu, L. Wang, Y. H. Zhang and J. H. Ye, *Small Methods*, 2021, **5**, 2100125.
- 2 W. X. Liu, L. H. Yu, R. L. Yin, X. L. Xu, J. X. Feng, X. Jiang, D. Zheng, X. L. Gao, X. B. Gao, W. B. Que, P. C. Ruan, F. F. Wu, W. H. Shi and X. H. Cao, *Small*, 2020, **16**, 1906775.
- 3 R. Boppella, J. Park, H. Lee, G. Jang and J. Moon, *Small Methods*, 2020, **4**, 2000043.
- 4 Y. Y. Qi, L. Zhang, L. Sun, G. J. Chen, Q. M. Luo, H. Q. Xin, J. H. Peng, Y. Li and F. Ma, *Nanoscale*, 2020, **12**, 1985-1993.
- 5 J. Z. Li, G. D. Wei, Y. K. Zhu, Y. L. Xi, X. X. Pan, Y. Ji, I. V. Zatonovsky and W. Han, *J. Mater. Chem. A.*, 2017, **5**, 14828-14837.
- 6 L. W. Jiang, N. Yang, C. X. Yang, X. Y. Zhu, Y. N. Jiang, X. P. Shen, C. C. Li and Q. F. Sun, *Appl. Catal., B*, 2020, **269**, 118780.
- 7 X. F. Ji, C. Q. Cheng, Z. H. Zang, L. L. Li, X. Li, Y. H. Cheng, X. J. Yang, X. F. Yu, Z. M. Lu, X. H. Zhang and H. Liu, *J. Mater. Chem. A.*, 2020, **8**, 21199-21207.
- 8 X. Luo, P. X. Ji, P. Y. Wang, R. L. Cheng, D. Chen, C. Lin, J. N. Zhang, J. W. He, Z. H. Shi, N. Li, S. Q. Xiao and S. C. Mu, *Adv. Mater.*, 2020, **10**, 1903891.
- 9 V. S. Sumi, M. A. Sha, S. R. Arunima and S. M. A. Shibli, *Electrochim. Acta*, 2019, **303**, 67-77.
- 10 D. T. Tran, H. T. Le, V. H. Hoa, N. H. Kim and J. H. Lee, *Nano Energy*, 2021, **84**, 105861.
- 11 Y. H. Wu, Y. Y. Yi, Z. T. Sun, H. Sun, T. Q. Guo, M. H. Zhang, L. F. Cui, K. Jiang, Y. Peng and J. Y. Sun, *Chem. Eng. J.*, 2020, **390**, 124515.
- 12 J. H. Bao, Y. M. Zhou, Y. W. Zhang, X. L. Sheng, Y. Y. Wang, S. Liang, C. Guo, W. Yang, T. Zhuang and Y. J. Hu, *J. Mater. Chem. A.*, 2020, **8**, 22181-22190.
- 13 H. J. Zhang, X. P. Li, A. Hähnel, V. Naumann, C. Lin, S. Azimi, S. L. Schweizer, A. W. Maijenburg and R. B. Wehrspohn, *Adv. Funct. Mater.*, 2018, **28**, 1706847.
- 14 X. P. Liu, S. F. Deng, D. D. Xiao, M. X. Gong, J. N. Liang, T. H. Zhao, T. Shen and D. L. Wang, *Adv. Funct. Mater.*, 2019, **11**, 42233-42242.
- 15 S.-F. Sun, X. Zhou, B. W. Cong, W. Z. Hong and G. Chen, *ACS Catal.*, 2020, **10**, 9086-9097.
- 16 J.-T. Ren, Y.-S. Wang, L. Chen, L.-J. Gao, W.-W. Tian and Z.-Y. Yuan, *Chem. Eng. J.*, 2020, **389**, 124408.
- 17 X. P. Liu, S. F. Deng, P. F. Liu, J. N. Liang, M. X. Gong, C. L. Lai, Y. Lu, T. H. Zhao and D. L. Wang, *Sci. Bull.*, 2019, **64**, 1675-1684.
- 18 Q. Yue, J. Sun, S. Chen, Y. Zhou, H. J. Li, Y. Chen, R. Zhang, G. Wei and Y. J. Kang, *ACS Appl. Mater. Interfaces* 2020, **12**, 18570-18577.
- 19 M. J. Yi, B. B. Lu, X. T. Zhang, Y. B. Tan, Z. Y. Zhu, Z. C. Pan and J. H. Zhang, *Appl. Catal., B*, 2021, **283**, 119635.
- 20 D. Ma, R. H. Li, Z. L. Zheng, Z. J. Jia, K. Meng, Y. Wang, G. M. Zhu, H. Zhang and T. Qi, *ACS Sustainable Chem. Eng.*, 2018, **6**, 14275-14282.
- 21 L. B. Wu, L. Yu, F. H. Zhang, B. McElhenny, D. Luo, A. Karim, S. Chen and Z. F. Ren, *Adv. Funct. Mater.*, 2020, **31**, 2006484.
- 22 W.-Z. Chen, P.-Y. Liu, L. Zhang, Y. Liu, Z. L. Liu, J. He and Y.-Q. Wang, *Chem. Eng. J.*, 2021, **424**, 130434.
- 23 S. Wang, J. G. Cai, C. Lv, C. Hu, H. T. Guan, J. Q. Wang, Y. Shi, J. F. Song, A. Watanabe and X. B. Ge, *Chem. Eng. J.*, 2021, **420**, 129972.
- 24 Y. K. Liu, S. Jiang, S. J. Li, L. Zhou, Z. H. Li, J. M. Li and M. F. Shao, *Appl. Catal., B*, 2019, **247**, 107-114.
- 25 Y. Yang, Y. C. Xie, Z. H. Yu, S. S. Guo, M. W. Yuan, H. Q. Yao, Z. P. Liang, Y. R. Lu, T.-S. Chan, C. Li, H. L. Dong and S. L. Ma, *Chem. Eng. J.*, 2021, **419**, 129512.
- 26 J. H. Shi, F. Qiu, W. B. Yuan, M. M. Guo and Z.-H. Lu, *Chem. Eng. J.*, 2021, **403**, 126312.
- 27 K. Q. Dai, N. Zhang, L. L. Zhang, L. X. Yin, Y. F. Zhao and B. Zhang, *Chem. Eng. J.*, 2021, **414**,

128804.

- 28 C. L. Li, Z. J. Zhang and R. Liu, *Small*, 2020, **16**, e2003777.
- 29 K. R. Park, D. T. Tran, T. T. Nguyen, N. H. Kim and J. H. Lee, *Chem. Eng. J.*, 2021, **422**, 130048.
- 30 L. L. Chai, Z. Y. Hu, X. Wang, Y. W. Xu, L. J. Zhang, T.-T. Li, Y. Hu, J. J. Qian and S. M. Huang, *Adv. Sci.*, 2020, **7**, 1903195.
- 31 J. Q. Jiao, W. J. Yang, Y. Pan, C. Zhang, S. J. Liu, C. Chen and D. S. Wang, *Small*, 2020, **16**, 2002124.
- 32 Q. Wang, Z. Q. Liu, H. Y. Zhao, H. Huang, H. Jiao and Y. P. Du, *J. Mater. Chem. A.*, 2018, **6**, 18720-18727.
- 33 T. Dong, X. Zhang, P. Wang, H.-S. Chen and P. Yang, *Carbon*, 2019, **149**, 222-233.
- 34 P. Zhang, X. F. Lu, J. w. Nai, S.-Q. Zang and X. W. Lou, *Adv. Sci.*, 2019, **6**, 1900576.
- 35 S.-Q. Liu, M.-R. Gao, S. B. Liu and J.-L. Luo, *Appl. Catal., B*, 2021, **292**, 120148.
- 36 C.-F. Li, J.-W. Zhao, L.-J. Xie, J.-Q. Wu and G.-R. Li, *Appl. Catal., B*, 2021, **291**, 119987.
- 37 S. Yue, S. S. Wang, Q. Z. Jiao, X. T. Feng, K. Zhan, Y. Q. Dai, C. H. Feng, H. S. Li, T. Y. Feng and Y. Zhao, *ChemSusChem*, 2019, **12**, 4461-4470.
- 38 C. Du, L. Yang, F. L. Yang, G. Z. Cheng and W. Luo, *ACS Catal.*, 2017, **7**, 4131-4137.
- 39 J.-G. Li, Y. Gu, H. C. Sun, L. Lv, Z. S. Li, X. Ao, X. Y. Xue, G. Hong and C. D. Wang, *Nanoscale*, 2019, **11**, 19959-19968.
- 40 Y. Lin, Y. Pan, S. J. Liu, K. A. Sun, Y. S. Cheng, M. Liu, Z. J. Wang, X. Y. Li and J. Zhang, *Appl. Catal., B*, 2019, **259**, 118039.
- 41 J. H. Lin, Y. T. Yan, C. Li, X. Q. Si, H. H. Wang, J. L. Qi, J. Cao, Z. X. Zhong, W. D. Fei and J. C. Feng, *Nano-Micro Lett.*, 2019, **11**, 55.
- 42 Y. Jeung, H. Jung, D. Kim, H. Roh, C. Lim, J. W. Han and K. Yong, *J. Mater. Chem. A.*, 2021, **9**, 12203-12213.
- 43 M. W. Peng, D. L. Shi, Y. H. Sun, J. Cheng, B. Zhao, Y. M. Xie, J. C. Zhang, W. Guo, Z. Jia, Z. Q. Liang and L. Jiang, *Adv. Mater.*, 2020, **32**, 1908201.
- 44 D. Kim, Y. Jeong, H. Roh, C. Lim and K. Yong, *J. Mater. Chem. A.*, 2021, **9**, 10909-10920.
- 45 Y. J. Li, H. C. Zhang, M. Jiang, Y. Kuang, X. M. Sun and X. Duan, *Nano Res.*, 2016, **9**, 2251-2259.
- 46 X. Tong, Y. Li, N. Pang, Y. H. Qu, C. H. Yan, D. Y. Xiong, S. H. Xu, L. W. Wang and P. K. Chu, *Chem. Eng. J.*, 2021, **425**, 130455.
- 47 D. Li, C. C. Liu, W. X. Ma, S. J. Xu, Y. K. Lu, W. X. Wei, J. J. Zhu and D. L. Jiang, *Electrochim. Acta*, 2021, **367**, 137492.
- 48 R. X. Jin, J. Huang, G. L. Chen, W. Chen, B. Ouyang, D. L. Chen, E. Kan, H. Zhu, C. R. Li, D. Z. Yang and K. Ostrikov, *Chem. Eng. J.*, 2020, **402**, 126257.
- 49 D. R. Liyanage, D. Li, Q. B. Cheek, H. Baydoun and S. L. Brock, *J. Mater. Chem. A.*, 2017, **5**, 17609-17618.
- 50 Z. Liang, W. Zhou, S. Gao, R. Zhao, H. J. Zhang, Y. Tang, J. Cheng, T. Qiu, B. Zhu, C. Qu, W. Guo, Q. Wang and R. Zou, *Small*, 2020, **16**, 1905075.
- 51 C. H. Li, E. H. Zhou, Z. Y. Yu, H. X. Liu and M. Xiong, *Appl. Catal., B*, 2020, **269**, 118771.
- 52 C. Chen, H. Su, L.-N. Lu, Y.-S. Hong, Y. Z. Chen, K. Xiao, T. Ouyang, Y. L. Qin and Z.-Q. Liu, *Chem. Eng. J.*, 2021, **408**, 127814.
- 53 T. Y. Wang, G. Nam, Y. Jin, X. Y. Wang, P. J. Ren, M. G. Kim, J. S. Liang, X. D. Wen, H. Jang, J. Han, Y. H. Huang, Q. Li and J. Cho, *Adv. Mater.*, 2018, **30**, 1800757.
- 54 J. X. Chen, Q. W. Long, K. Xiao, T. Ouyang, N. Li, S. Y. Ye and Z.-Q. Liu, *Sci. Bull.*, 2021, **66**, 1063-1072.
- 55 D. Zhang, H. Li, A. Riaz, A. Sharma, W. Liang, Y. Wang, H. Chen, K. Vora, D. Yan, Z. Su, A.

- Tricoli, C. Zhao, F. J. Beck, K. Reuter, K. Catchpole and S. Karuturi, *Energy Environ. Sci.*, 2021, DOI: 10.1039/d1ee02013g.
- 56 H. Liang, A. N. Gandi, D. H. Anjum, X. Wang, U. Schwingenschlogl and H. N. Alshareef, *Nano Lett.*, 2016, **16**, 7718-7725.
- 57 Q. Yu, Z. Zhang, S. Qiu, Y. Luo, Z. Liu, F. Yang, H. Liu, S. Ge, X. Zou, B. Ding, W. Ren, H. M. Cheng, C. Sun and B. Liu, *Nat. Commun.*, 2021, **12**, 6051.
- 58 C. L. Huang, K. Sasaki, D. Senthil Raja, C. T. Hsieh, Y. J. Wu, J. T. Su, C. C. Cheng, P. Y. Cheng, S. H. Lin, Y. Choi and S. Y. Lu, *Adv. Energy Mater.*, 2021, DOI: 10.1002/aenm.202101827, 2101827.
- 59 J. Abed, S. Ahmadi, L. Laverdure, A. Abdellah, C. P. O'Brien, K. Cole, P. Sobrinho, D. Sinton, D. Higgins, N. J. Mosey, S. J. Thorpe and E. H. Sargent, *Adv. Mater.*, 2021, **33**, e2103812.
- 60 Y. Wang, X. Li, M. Zhang, Y. Zhou, D. Rao, C. Zhong, J. Zhang, X. Han, W. Hu, Y. Zhang, K. Zaghbi, Y. Wang and Y. Deng, *Adv. Mater.*, 2020, **32**, e2000231.
- 61 H. Sun, C. Tian, G. Fan, J. Qi, Z. Liu, Z. Yan, F. Cheng, J. Chen, C. P. Li and M. Du, *Adv. Funct. Mater.*, 2020, **30**, 1910596.
- 62 D. Wu, D. Chen, J. Zhu and S. Mu, *Small*, 2021, **17**, e2102777.
- 63 F. Nur Indah Sari, S. Abdillah and J.-M. Ting, *Chem. Eng. J.*, 2021, **416**, 129165.
- 64 T. Kou, S. Wang, R. Shi, T. Zhang, S. Chiovoloni, J. Q. Lu, W. Chen, M. A. Worsley, B. C. Wood, S. E. Baker, E. B. Duoss, R. Wu, C. Zhu and Y. Li, *Adv. Energy Mater.*, 2020, **10**, 2002955.
- 65 L. Yu, L. Wu, B. McElhenny, S. Song, D. Luo, F. Zhang, Y. Yu, S. Chen and Z. Ren, *Energy Environ. Sci.*, 2020, **13**, 3439-3446.
- 66 S. Niu, W. J. Jiang, T. Tang, L. P. Yuan, H. Luo and J. S. Hu, *Adv. Funct. Mater.*, 2019, **29**, 1902180.
